# Supplementary material for: Biomolecular Corona Stability in Association with Plasma Cholesterol Level
Source: MDPI journal article supplement (doi:10.3390/nano12152661), 2022-08-03
Supplement: s1 [file s1]

## Supplementary Information

# Biomolecular Corona Stability in Association with Plasma Cholesterol Level

Duong N. Trinh <sup>1</sup>, Meda Radlinskaite <sup>1,2</sup>, Jack Cheeseman <sup>3,4</sup>, Gunter Kuhnle <sup>5</sup>, Helen M. I. Osborn <sup>4</sup>, Paula Meleady <sup>6</sup>, Daniel I. R. Spencer <sup>3</sup> and Marco P. Monopoli <sup>1,\*</sup>

<sup>1</sup> Department of Chemistry, Royal College of Surgeons in Ireland, RCSI University of Medicine and Health Sciences, Dublin 2, Ireland; ngocduongtrinh@rcsi.ie

<sup>2</sup> School of Physics & Clinical & Optometric Sciences, Technological University Dublin, Dublin 7, Ireland; c18307936@mytudublin.ie

<sup>3</sup> Ludger Ltd., Culham Science Centre, Abingdon OX14 3EB, UK; jack.cheeseman@ludger.com (J.C.); daniel.spencer@ludger.com (D.I.R.S.)

<sup>4</sup> School of Pharmacy, University of Reading, Whiteknights, Reading RG6 6AD, UK; h.m.i.osborn@reading.ac.uk

<sup>5</sup> Department of Food and Nutritional Sciences, University of Reading, Whiteknights, Reading RG6 6AH, UK; g.g.kuhnle@reading.ac.uk

<sup>6</sup> School of Biotechnology, Dublin City University, Dublin 9, Ireland; paula.meleady@dcu.ie

\* Correspondence: marcomonopoli@rcsi.ie

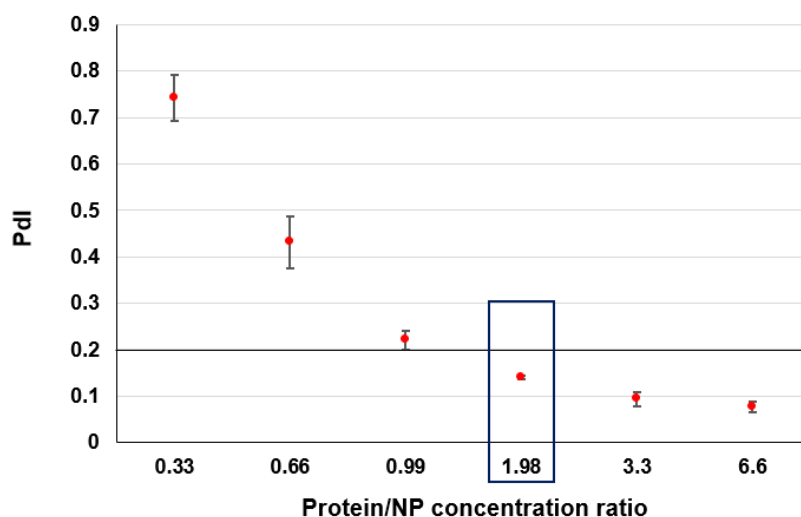

**Figure S1.** Silica coronas aggregated with decreasing plasma protein/NP concentration ratio. The protein/NP ratio of 1.98 was selected to obtain a corona with the Pdl below 0.2. Error bar: SD of the mean (n = 3).

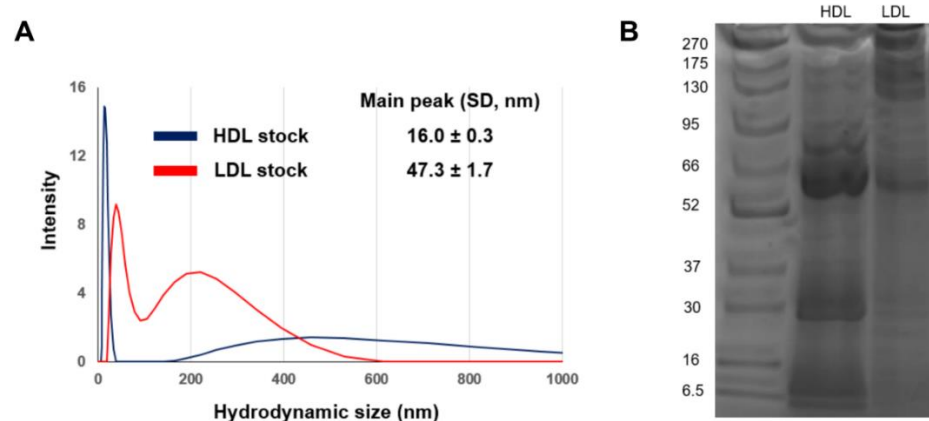

**Figure S2.** Plasma HDL and LDL characterization. **(A)** Hydrodynamic sizes of the HDL and LDL stock particles in PBS pH 7.4. **(B)** SDS-PAGE gel of the HDL and LDL.

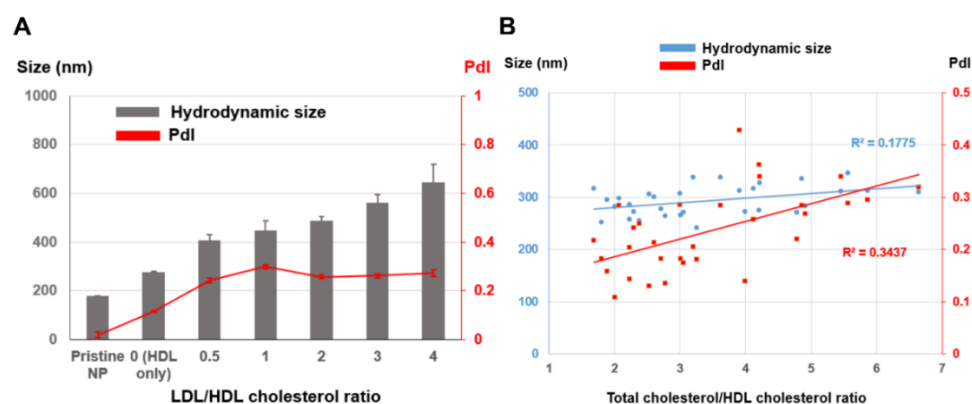

**Figure S3.** High LDL cholesterol induces polystyrene NP aggregation. **(A)** LDL induced polystyrene NPs; however, the aggregation was less severe than that of silica NPs. **(B)** Positive correlations between cholesterol ratio and both hydrodynamic size and Pdl. The highest  $R^2$  was observed between the ratio and sample Pdl values (0.3437).

### A) Silica

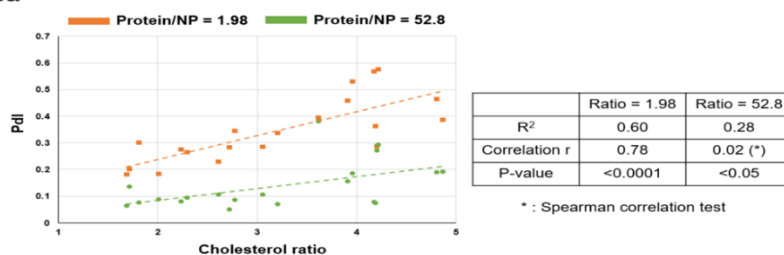

### B) Polystyrene

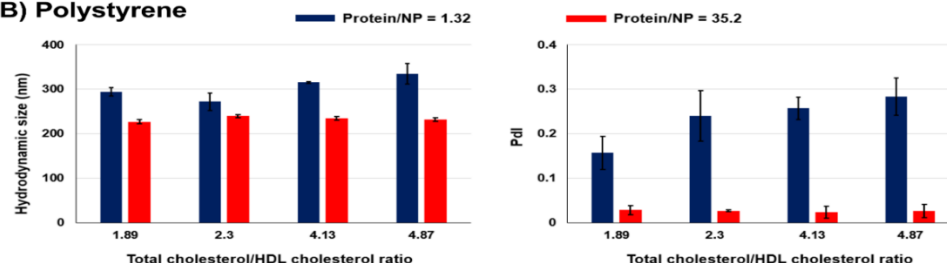

**Figure S4.** The colloidal stability variation was more noticeable with the corona formed at low protein/NP conditions. (A) A low correlation between cholesterol and PDI was present in the silica coronas at the protein/NP ratio of 52.8. (B) The hydrodynamic sizes and PDI of 200 nm polystyrene coronas formed in four different individuals' plasma samples at the ratio of 1.32 (blue) and 35.2 (red). The x-axis shows the plasma cholesterol ratios of the corresponding individual plasma samples. The coronas were stable even at very high plasma cholesterol level. The plasma samples used in this experiment were not the same as those in the cohort study. Error bar: SD of the mean (n = 3).

**Table S1.** DLS sizes of silica coronas obtained from pooled human plasma. The concentrations of the particles and plasma proteins were varied around three concentration ratios: 1.98; 26.4 and 52.8. The PDI values indicate good colloidal stability of all the samples.

| Samples                                                               | Protein/NP ratio | Main peak (nm) | PdI   |
|-----------------------------------------------------------------------|------------------|----------------|-------|
| <b>1. Changing plasma concentration with fixed NPs' concentration</b> |                  |                |       |
| 1 mg/mL NPs, 3% HP                                                    | 1.98             | 164.8          | 0.062 |
| 1 mg/mL NPs, 40% HP                                                   | 26.4             | 145.3          | 0.007 |
| 1 mg/mL NPs, 80% HP                                                   | 52.8             | 129.5          | 0.006 |
| <b>2. Changing NPs' concentration with fixed plasma concentration</b> |                  |                |       |
| 40% HP, 0.5 mg/mL NPs                                                 | 52.8             | 134.7          | 0.033 |
| 40% HP, 1 mg/mL NPs                                                   | 26.4             | 145.3          | 0.007 |
| 40% HP, 13.3 mg/mL NPs                                                | 1.98             | 144.1          | 0.039 |
| <b>3. Fixed plasma/NP concentration at 1.98</b>                       |                  |                |       |
| 3% HP, 1 mg/mL NPs                                                    | 1.98             | 164.8          | 0.062 |

|                        |      |       |       |
|------------------------|------|-------|-------|
| 40% HP, 13.3 mg/mL NPs | 1.98 | 144.1 | 0.039 |
| 80% HP, 26.7 mg/mL NPs | 1.98 | 160.1 | 0.089 |

**Table S2.** Top protein abundances of 100 nm silica and 200 nm carboxylated polystyrene plasma coronas. The coronas were formed in pooled plasma at the protein/NP ratios of 1.98 and 1.32, respectively. The abundances were ranked by the summed peptide intensity in binary logarithm form. While both of them shared fibrinogen at the top, apoA1 and apoB100 (bolded) were less abundant in the polystyrene corona.

| Rank number | Silica corona                 |                             | Polystyrene corona            |                                              |
|-------------|-------------------------------|-----------------------------|-------------------------------|----------------------------------------------|
|             | Intensity (log <sub>2</sub> ) | Protein                     | Intensity (log <sub>2</sub> ) | Protein                                      |
| 1           | 37.3                          | <b>ApoA1</b>                | 35.4                          | Fibrinogen gamma chain                       |
| 2           | 36.8                          | Fibrinogen gamma chain      | 34.7                          | Fibrinogen beta chain                        |
| 3           | 36.8                          | Fibrinogen beta chain       | 34.6                          | Fibrinogen alpha chain                       |
| 4           | 36.2                          | Fibrinogen alpha chain      | 33.1                          | Albumin                                      |
| 5           | 33.8                          | <b>ApoB100</b>              | 32.8                          | Complement C3                                |
| 6           | 33.2                          | Histidine-rich glycoprotein | 32.1                          | Complement factor H                          |
| 7           | 32.6                          | Kininogen-1                 | 31.4                          | Beta-2-glycoprotein 1                        |
| 8           | 32.5                          | ApoE                        | 31.4                          | <b>ApoA1</b>                                 |
| 9           | 32.1                          | ApoA4                       | 30.9                          | Vitronectin                                  |
| 10          | 31.7                          | Fibronectin                 | 30.9                          | Complement C4-B                              |
| 11          | 31.5                          | Albumin                     | 30.5                          | Fibronectin                                  |
| 12          | 31.4                          | Complement C3               | 30.4                          | <b>ApoB100</b>                               |
| 13          | 31.1                          | Coagulation factor XII      | 29.9                          | Inter-alpha-trypsin inhibitor heavy chain H4 |

|    |      |                                             |      |                                  |
|----|------|---------------------------------------------|------|----------------------------------|
| 14 | 30.8 | Complement C1q<br>subcomponent<br>subunit B | 29.8 | Histidine-rich gly-<br>coprotein |
| 15 | 30.6 | Immunoglobulin<br>heavy constant<br>gamma 3 | 29.7 | Kininogen-1                      |

**Table S3.** Correlation coefficients (r) of the plasma cholesterol level (total cholesterol, HDL cholesterol and cholesterol ratio) and the polystyrene corona's colloidal stability (DLS size and Pdl). Pearson correlation and Spearman correlation coefficients were calculated for normally distributed and non-normally distributed data, respectively. \*: Pearson correlation coefficients. *P*<0.05 are bolded.

|                              | Total cholesterol |          | HDL cholesterol |              | Cholesterol ratio |              |
|------------------------------|-------------------|----------|-----------------|--------------|-------------------|--------------|
|                              | r                 | <i>P</i> | r               | <i>P</i>     | r                 | <i>P</i>     |
| <b>Hydrodynamic<br/>size</b> | 0.15 (*)          | 0.42     | -0.26           | 0.163        | 0.42 (*)          | <b>0.018</b> |
| <b>Pdl</b>                   | 0.31 (*)          | 0.09     | -0.40           | <b>0.026</b> | 0.59 (*)          | <b>0.001</b> |
